# Supplementary material for: High CO2 permeation flux enabled by highly interconnected three-dimensional ionic channels in selective CO2 separation membranes
Source: Royal Society of Chemistry journal article supplement (doi:10.1039/c2ee22045h), 2012-01-01
Supplement: c2ee22045h.pdf [file c2ee22045h.pdf]

## SUPPLEMENTARY INFORMATION

Figure S1 shows the domain for carbon formation under the experimental conditions employed in this study. Outotec HSC Chemistry 5.0 was used for the thermodynamic analysis.

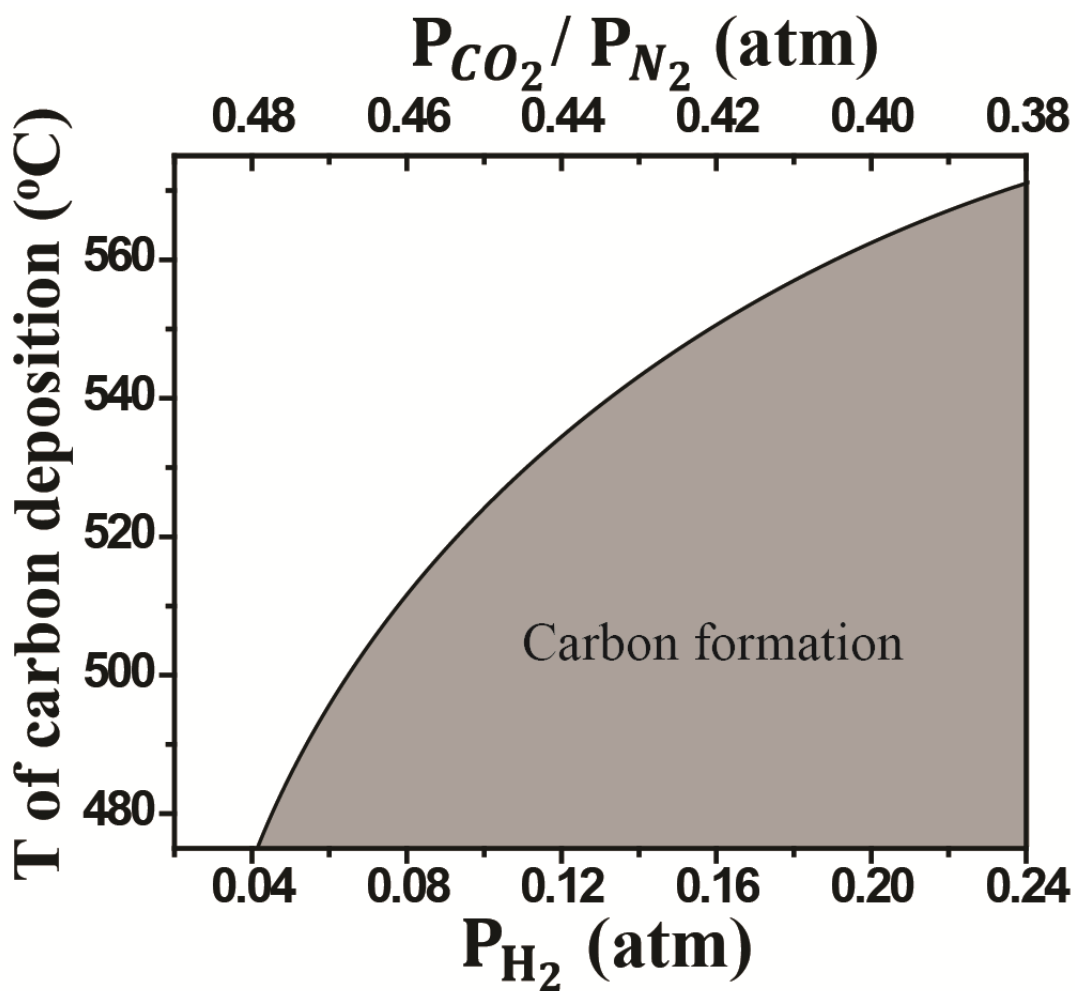

Figure S1 Carbon formation domain for a H<sub>2</sub>-CO<sub>2</sub>-N<sub>2</sub> system determined by thermodynamic analysis

### Derivation of CO<sub>2</sub> flux density equation (4)

For bulk-diffusion controlled charge transport in homogeneous mixed conductors, the classical transport theory can be used to quantify the flux density  $J_i$  of the active species  $i$

$$J_i = -\frac{D_i C_i}{RT} \nabla \eta_i = -\frac{\sigma_i}{(z_i F)^2} \nabla \eta_i = -\frac{\sigma_i}{(z_i F)^2} (\nabla \mu_i + z_i F \nabla \phi) \quad (\text{S1})$$

where  $D_i$ ,  $C_i$ ,  $\sigma_i$  and  $z_i$  represent the self-diffusivity, concentration, conductivity and charge of species  $i$ , respectively;  $\eta_i$  and  $\mu_i$  are electrochemical and chemical potentials of species  $i$ ;  $R$ ,  $F$  and  $T$  have their usual meanings. Applying eq. (S1) to a presumed homogeneous mixed CO<sub>3</sub><sup>2-</sup> (CO<sub>3</sub><sup>2-}=1) and O<sup>2-</sup> (O<sup>2-}=2) conductor, we can arrive at the following flux expression</sup></sup>

$$J_1 = -\frac{\sigma_1 \sigma_2}{z_1^2 F^2} \left( \frac{\nabla \mu_1 - z_1 / z_2 \nabla \mu_2}{\sigma_1 + \sigma_2} \right) \quad (\text{S2})$$

Considering the local chemical equilibrium CO<sub>2</sub> + O<sup>2-</sup> = CO<sub>3</sub><sup>2-</sup>, one has

$$J_1 = J_{CO_3^{2-}} = -\frac{1}{4F^2} \left( \frac{\sigma_{CO_3^{2-}} \sigma_{O^{2-}}}{\sigma_{CO_3^{2-}} + \sigma_{O^{2-}}} \right) \nabla \mu_{CO_2} = -\frac{RT}{4F^2} \left( \frac{\sigma_{CO_3^{2-}} \sigma_{O^{2-}}}{\sigma_{CO_3^{2-}} + \sigma_{O^{2-}}} \right) \nabla \ln P_{CO_2} \quad (\text{S3})$$

Assuming that  $\sigma_{CO_3^{2-}}$  and  $\sigma_{O^{2-}}$  are both  $P_{CO_2}$  independent, the steady-state flux  $J_{CO_2} = J_{CO_3^{2-}}$  can be integrated across the thickness  $L$  of the membrane exposed to a gradient of high  $P_{CO_2}'$  and low  $P_{CO_2}''$

$$J_{CO_2} = J_{CO_3^{2-}} = -\frac{RT}{4F^2} \left( \frac{\sigma_{CO_3^{2-}} \sigma_{O^{2-}}}{\sigma_{CO_3^{2-}} + \sigma_{O^{2-}}} \right) \ln \frac{P_{CO_2}''}{P_{CO_2}'} \quad (\text{S4})$$

For dual-phase ceramic-carbonate mixed-ion conductors, the microstructural and concentration effects have to be considered in the flux equation. The microstructural factors

such as porosity  $\varepsilon$  and tortuosity  $\tau$  would have a direct impact on the diffusivity of each ion.

The effective diffusivity of species  $i$ ,  $D_i^{\text{eff}}$ , can be expressed by

$$D_i^{\text{eff}} = \frac{\varepsilon}{\tau} D_i \quad (\text{S5})$$

On the other hand, the concentration of each species would also be changed by the phase volume ratio. The effective concentration  $C_i^{\text{eff}}$  per unit volume can be corrected by

$$C_i^{\text{eff}} = \varphi_i C_i \quad (\text{S6})$$

Substituting eqs. (S5) and (S6) into eqs. (S1-S4) leads to the modified flux equation shown in eq. (4) in the main context for dual-phase mixed carbonate-ion and oxide-ion conductors

$$J_{CO_2} = -\frac{RT}{4F^2} \frac{\varepsilon}{\tau} \left( \frac{\varphi \sigma_{CO_3^{2-}} (1-\varphi) \sigma_{O^{2-}}}{\varphi \sigma_{CO_3^{2-}} + (1-\varphi) \sigma_{O^{2-}}} \right) \ln \frac{P_{CO_2}^*}{P_{CO_2}'} \quad (\text{S7})$$

where  $\varphi$  is the volume fraction of carbonate phase.
